# Supplementary material for: Chemoprevention of Azoxymethane-induced Colon Carcinogenesis by Delta-Tocotrienol
Source: Oxford University Press journal article supplement (doi:10.1158/1940-6207.capr-18-0290), 2019-04-02
Supplement: 19406207capr180290-sup-206171_3_supp_5417098_pqs5qj.docx [file 19406207capr180290-sup-206171_3_supp_5417098_pqs5qj.docx]

| **Group 1 (Vehicle)** | **Rat #** | **Histology (Cancer)** | **Histology (Polyp)** |
| --- | --- | --- | --- |
|  | 72 | adenocarcinoma | adenoma |
|  | 83 | invasive cancer signet ring | adenoma |
|  | 85 | adenocarcinoma | adenoma |
|  | 87 | adenocarcinoma | adenoma |
|  | 103 | adenocarcinoma | adenoma |
|  | 109 | adenocarcinoma | adenoma |
|  | 112 | adenocarcinoma | adenoma |
|  | 128 | adenocarcinoma | adenoma |
|  | 129 | polypoid adenocarcinoma | adenoma |
|  | 130 | adenocarcinoma | adenoma |
| **Group 2 (Untreated NT )** | **Rat #** | **Histology (Cancer)** | **Histology (Polyp)** |
|  | 37 | adenocarcinoma | adenoma |
|  | 51 | adenocarcinoma | adenoma |
|  | 60 | adenocarcinoma | adenoma |
|  | 69 | adenocarcinoma | adenoma |
|  | 101 | invasive cancer signet ring | adenoma |
|  | 127 | adenocarcinoma | adenoma |
|  | 131 | adenocarcinoma | lymph nodes |
|  | 133 | adenocarcinoma | adenoma |
|  | 134 | adenocarcinoma | adenoma |
|  | 136 | adenocarcinoma | adenoma |
| **Group 3 (Sulindac)** | **Rat #** | **Histology (Cancer)** | **Histology (Polyp)** |
|  | 69 | no adenocarcinoma | no adenoma |
|  | 70 | no adenocarcinoma | lymph nodes |
|  | 77 | invasive cancer signet ring | adenoma |
|  | 80 | no adenocarcinoma | no adenoma |
|  | 90 | no adenocarcinoma | no adenoma |
|  | 92 | adenocarcinoma | adenoma |
|  | 97 | invasive cancer signet ring | adenoma |
|  | 116 | adenocarcinoma | adenoma |
|  | 125 | adenocarcinoma | adenoma |
|  | 126 | adenocarcinoma | adenoma |
| **Group 4 (Delta-tocotrienol)** | **Rat#** | **Histology (Cancer)** | **Histology (Polyp)** |
|  | 68 | no adenocarcinoma | no adenoma |
|  | 71 | no adenocarcinoma | adenoma |
|  | 78 | no adenocarcinoma | no adenoma |
|  | 81 | no adenocarcinoma | adenoma |
|  | 82 | no adenocarcinoma | adenoma |
|  | 84 | no adenocarcinoma | lymph nodes |
|  | 98 | no adenocarcinoma | adenoma |
|  | 111 | invasive cancer signet ring | adenoma |
|  | 117 | no adenocarcinoma | adenoma |
|  | 120 | no adenocarcinoma | adenoma |
